# Supplementary material for: Mobile Colistin Resistance Genetic Determinants of Non-Typhoid Salmonella enterica Isolates from Russia
Source: MDPI journal article supplement (doi:10.3390/microorganisms9122515), 2021-12-04
Supplement: s1 [file s1]

Defining the uniqueness of isolates using the NCBI Pathogen Detection system

Using the NCBI Pathogen Detection system a request for the isolates under study can be submitted to the database. The screenshots shown below display the results for the four Russian isolates described in our study (available under URL link [https://www.ncbi.nlm.nih.gov/pathogens/isolates/#SLR1\\_8250%20OR%20SLR1\\_7627%20OR%20SLR1\\_8245%20OR%20SLR1\\_8094](https://www.ncbi.nlm.nih.gov/pathogens/isolates/#SLR1_8250%20OR%20SLR1_7627%20OR%20SLR1_8245%20OR%20SLR1_8094)). To identify the relatedness of the studied isolates to other isolates in the NCBI Pathogen Detection system, a 50-SNP single-linkage clustering was automatically created (Figure S1). When the “SNP cluster” field remains empty, it indicates that the system did not find isolates in the database with  $\leq 50$  SNP differences. For the isolates in our study, i.e. SLR1\_7627, SLR1\_8094, and SLR1\_8250 no closely related isolates were found in the databases. However, isolates SLR1\_8245 and SLR1\_8239 were similar (0 SNP differences) and they formed a SNP cluster named PDS000093458.2 (Figure S2). These two isolates SLR1\_8245 and SLR1\_8239 belonged to the same salmonellosis outbreak (El’ban village in the Khabarovsk Territory) (Figure S2). So, we concluded that our isolates did not have a close relationship (at the  $\leq 50$  SNP threshold) to other isolates in the NCBI Pathogen Detection system or to each other – with the exception of isolates SLR1\_8245 and SLR1\_8239.

Search

SLR1\_8250 OR SLR1\_7627 OR SLR1\_8245 OR SLR1\_8094

✕

🔍

Share

Save

Saved Searches

Watched Isolates

Filters

Matched Clusters

| # | Organism groups     | SNP cluster    | Matched isolates | Matched clinical isolates | Matched environmental isolates | Total isolates | Minimal min-diff | Minimal min-same | Latest update | count:1 |
|---|---------------------|----------------|------------------|---------------------------|--------------------------------|----------------|------------------|------------------|---------------|---------|
| 1 | Salmonella enterica | PDS000093458.2 | 1                | 1                         | 0                              | 2              | n/a              | 0                | 2021-08-03    |         |

Matched Isolates

Page 1 of 1

Records per Page 20

Choose columns

Download

Hide plus AMR genotypes

Expand all

Cross-browser selection

Displaying 1 - 4 of 4

| # | Organism group      | Strain    | Isolate identifiers     | Isolate        | Create date | Location | Isolation type | SNP cluster    | Min-same | Min-diff | BioSample     | Assembly        | AMR genotypes                                                                                          | Computed types                                               |
|---|---------------------|-----------|-------------------------|----------------|-------------|----------|----------------|----------------|----------|----------|---------------|-----------------|--------------------------------------------------------------------------------------------------------|--------------------------------------------------------------|
| 1 | Salmonella enterica | SLR1_7627 | SLR1_7627<br>SR57105757 | PDT000826652.1 | 2020-08-30  | Russia   | clinical       |                | n/a      | n/a      | SAHNI15666300 | GCA_014334235.1 | Complete (11)<br>aadA1<br>aph(3')-Ib<br>aph(6)-Id<br>Show all 11 genes                                 | Serotype:<br>Bovismorbificans<br>Antigen formula:<br>8:r:1,5 |
| 2 | Salmonella enterica | SLR1_8094 | SLR1_8094<br>SR57105758 | PDT000826651.1 | 2020-08-30  | Russia   | clinical       |                | n/a      | n/a      | SAHNI15666301 | GCA_014334215.1 | Complete (14)<br>aac(3)-Ilg<br>aac(6)-IIfc<br>aph(3')-Ib<br>Partial (1)<br>ere(A)<br>Show all 15 genes | Serotype:<br>Enteritidis<br>Antigen formula:<br>9:g,m:-      |
| 3 | Salmonella enterica | SLR1_8245 | SLR1_8245<br>SR59556581 | PDT001100276.2 | 2021-07-31  | Russia   | clinical       | PDS000093458.2 | 0        | n/a      | SAHNI20345806 | GCA_019428465.1 | Complete (5)<br>catA1<br>mcr-1.1<br>mdsA<br>Show all 5 genes                                           | Serotype:<br>Enteritidis<br>Antigen formula:<br>9:g,m:-      |
| 4 | Salmonella enterica | SLR1_8250 | SLR1_8250<br>SR57105755 | PDT000826653.1 | 2020-08-30  | Russia   | clinical       |                | n/a      | n/a      | SAHNI15666299 | GCA_014334255.1 | Complete (3)<br>mcr-1.1<br>mdsA<br>mdsB                                                                | Serotype:<br>Enteritidis<br>Antigen formula:<br>9:g,m:-      |

Figure S1. Results of a similarity check (threshold  $\leq 50$  SNPs) of our analysed isolates with isolates contained in the NCBI Pathogen Detection system using URL [https://www.ncbi.nlm.nih.gov/pathogens/isolates/#SLR1\\_8250%20OR%20SLR1\\_7627%20OR%20SLR1\\_8245%20OR%20SLR1\\_8094](https://www.ncbi.nlm.nih.gov/pathogens/isolates/#SLR1_8250%20OR%20SLR1_7627%20OR%20SLR1_8245%20OR%20SLR1_8094)

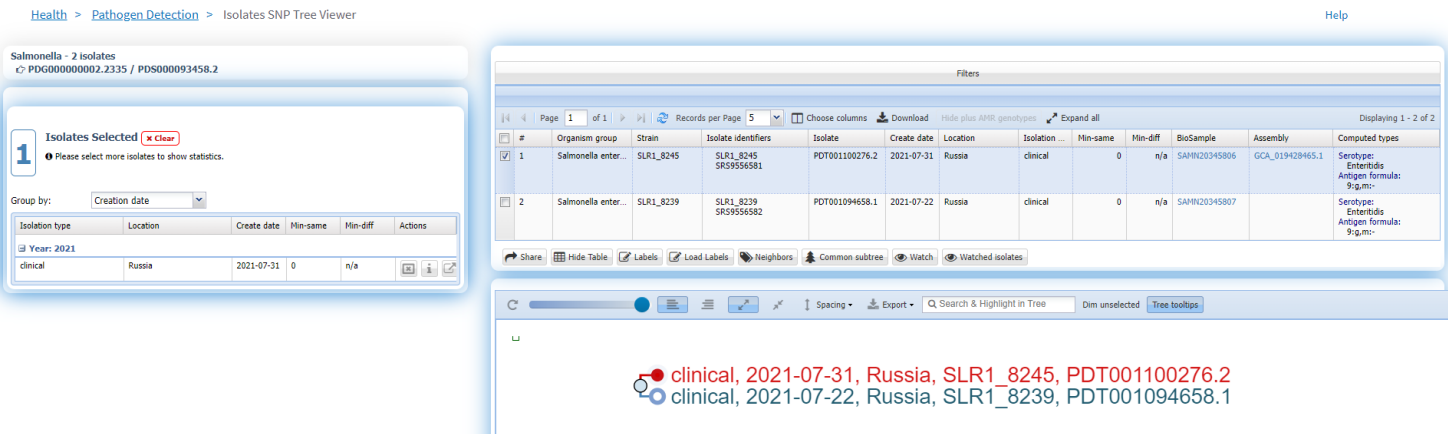

Figure S2. Screenshot of SNP cluster PDS000093458.2. Isolates *S. Enteritidis* SLR1\_8245 and SLR1\_8239 were isolated from the same outbreak and have 0 SNP differences.

Definition of uniqueness of isolates using EnteroBase system.

For each of the isolates EnteroBase system automatically calculated cluster numbers based on algorithms of hierarchical clustering where HC0 (indistinguishable), HC2 (two loci differences), HC5 (five loci differences), HC10 (differ in 10 loci), and HC20 (differ in 20 loci) etc. (Figure S3). For isolates SLR1\_7627 (HC0\_238586), SLR1\_8250 (HC0\_238575), SLR1\_8245 (HC0\_278706) HC0 cluster number was the same at levels HC2, HC5, HC10, and HC20, and for isolate SLR1\_8094 HC0\_236467 was the same at levels HC2, HC5, HC10.

|                                           |        |                |        |        |        |      |      |       |       |       |  |  |  |  |
|-------------------------------------------|--------|----------------|--------|--------|--------|------|------|-------|-------|-------|--|--|--|--|
| EnteroBase                                |        |                |        |        |        |      |      |       |       |       |  |  |  |  |
| Salmonella                                |        |                |        |        |        |      |      |       |       |       |  |  |  |  |
| Log In Register Help v1.1.2               |        |                |        |        |        |      |      |       |       |       |  |  |  |  |
| Species Home                              |        |                |        |        |        |      |      |       |       |       |  |  |  |  |
| Tasks                                     |        |                |        |        |        |      |      |       |       |       |  |  |  |  |
| Upload Reads                              |        |                |        |        |        |      |      |       |       |       |  |  |  |  |
| Search Strains                            |        |                |        |        |        |      |      |       |       |       |  |  |  |  |
| Find ST(s)                                |        |                |        |        |        |      |      |       |       |       |  |  |  |  |
| Workspace:None Rows Total:4 Filtered:4    |        |                |        |        |        |      |      |       |       |       |  |  |  |  |
| Experimental Data   cgMLST V2 + HierCC V1 |        |                |        |        |        |      |      |       |       |       |  |  |  |  |
| Uberstrain                                | ST     | HC0 (indist... | HC2    | HC5    | HC10   | HC20 | HC50 | HC100 | HC200 | HC400 |  |  |  |  |
| SLR1_8094                                 | 238579 | 236467         | 236467 | 236467 | 236467 | 2    | 2    | 2     | 2     | 2     |  |  |  |  |
| SLR1_7627                                 | 238586 | 238586         | 238586 | 238586 | 238586 | 499  | 499  | 499   | 499   | 499   |  |  |  |  |
| SLR1_8250                                 | 238575 | 238575         | 238575 | 238575 | 238575 | 87   | 87   | 12    | 12    | 12    |  |  |  |  |
| SLR1_8245                                 | 278706 | 278706         | 278706 | 278706 | 278706 | 87   | 87   | 12    | 12    | 12    |  |  |  |  |

Figure S3. Studied isolates and their sequence types (ST) and cluster numbers (HC0, HC2, HC5, HC10, HC20 etc.) calculated based on algorithms of hierarchical clustering of cgMLST data in the EnteroBase system.

To show that the database did not contain any isolate that was identical to our isolates (at least with a difference of 10 loci) we performed separate searching of values of HC10 cluster numbers of each studied isolate in EnteroBase. The example of the query

Search all Strains of Salmonella

Predefined Search

Ignore Legacy Data Only Editable Strains Show Failed Assemblies Show Sub Strains

Strain Metadata AND OR Experimental Data

Experiment Type cgMLST V2 + HierCC V1

Data Type HC10

Operator contains

Value 236467

Clear

Cancel Submit

For each HC10 value we received only one isolate (HC10\_238586 - SLR1\_7627, HC10\_236467 - SLR1\_8094, and HC10\_238575 - SLR1\_8250) (Figure S4).

|            |        |                |        |        |        |        |      |       |       |       |  |  |  |  |
|------------|--------|----------------|--------|--------|--------|--------|------|-------|-------|-------|--|--|--|--|
| Uberstrain | ST     | HC0 (indist... | HC2    | HC5    | HC10   | HC20   | HC50 | HC100 | HC200 | HC400 |  |  |  |  |
| SLR1_7627  | 238586 | 238586         | 238586 | 238586 | 238586 | 238586 | 499  | 499   | 499   | 499   |  |  |  |  |
| SLR1_8094  | 238579 | 236467         | 236467 | 236467 | 236467 | 2      | 2    | 2     | 2     | 2     |  |  |  |  |
| SLR1_8250  | 238575 | 238575         | 238575 | 238575 | 238575 | 238575 | 87   | 87    | 12    | 12    |  |  |  |  |
| SLR1_8239  | 278706 | 278706         | 278706 | 278706 | 278706 | 278706 | 87   | 87    | 12    | 12    |  |  |  |  |
| SLR1_8245  | 278706 | 278706         | 278706 | 278706 | 278706 | 278706 | 87   | 87    | 12    | 12    |  |  |  |  |

Figure S4: Results of individual queries using different HC10 values (HC10 = 238586, HC10 = 236467, and HC10 = 238575).

As expected (see supplementary figure S2), for HC10 278706 we received two outbreak isolates SLR1\_8245 and SLR1\_8239.

We concluded that we did not reveal any close relationship of our isolates to each other or to other isolates (with the exception of SLR1\_8245 and SLR1\_8239) by core genome MLST in the EnteroBase as our isolates showed at least 10 allele differences by cgMLST.
